# Supplementary material for: Bromine–lithium exchange under non-cryogenic conditions: TMSCH2Li–LiDMAE promoted C-2 lithiation of 2,3-dibromopyridine
Source: Royal Society of Chemistry journal article supplement (doi:10.1039/b810453k), 2008-01-01
Supplement: b810453k.pdf [file b810453k.pdf]

## **Bromine-lithium Exchange under Non Cryogenic Conditions : TMSCH<sub>2</sub>Li-LiDMAE promoted C-2 lithiation of 2,3- Dibromopyridine**

Philippe C. Gros\* and Fatima Elaachbouni

Groupe SOR, SRSMC, CNRS, Nancy Université, Faculté des Sciences, Boulevard des  
Aiguillettes, F-54506 Vandoeuvre-Lès-Nancy, France  
E-mail: Philippe.Gros@sor.uhp-nancy.fr; Fax: +33(0)383684785; Tel : +33(0)383684979

### **General considerations.**

2-Dimethylaminoethanol was distilled over KOH under nitrogen and stored over molecular sieves. *n*-BuLi (1.6M solutions in hexanes) was obtained from ACROS. TMSCH<sub>2</sub>Li (0.92 M solution in hexanes) was kindly offered by FMC Lithium. All reagents were commercially available and used as such or purified if needed. All solvents were distilled and stored over sodium wire before use. <sup>1</sup>H and <sup>13</sup>C NMR spectra were obtained in CDCl<sub>3</sub> (TMS as internal standard) on a Bruker AC200 instrument at 200 and 50 MHz respectively. GC experiments were performed on a Shimadzu chromatograph (FID detection) through a 15m capillary HP1 column. HRMS (ESI) were performed on a Bruker MICROTOF spectrometer.

### **General Procedure for selective C-2 lithiation of 2,3-dibromopyridine**

To a solution of 2-dimethylaminoethanol (164 mg, 1.84 mmoles) in hexane (6 mL) cooled at 0°C was added drop-wise TMSCH<sub>2</sub>Li (6 mL, 5.52 mmoles,) under a nitrogen atmosphere. After stirring for 30 min. at the same temperature, a solution of 2,3-dibromopyridine (436 mg, 1.84 mmoles) in toluene (2 mL) was added drop-wise. The obtained red solution was then stirred for 30 min. at 0°C and treated drop-wise with a solution of the appropriate electrophile (2.2 mmoles) in THF (2 mL) at -20°C. After 1h of stirring the mixture was hydrolyzed with water (10 mL). The organic layer was then extracted with diethylether (10 mL), dried over MgSO<sub>4</sub> and the solvents were evaporated. The crude product was subjected to GC analysis and finally purified by column chromatography using hexane-AcOEt mixtures as eluent.

## Products

**3-bromo-2-(trimethylsilyl)pyridine (2a).** Obtained by the general procedure using  $\text{ClSiMe}_3$  as electrophile. Purification by column chromatography (hexane/AcOEt:8/2) gave **2a** (76%) as a colorless oil.  $\delta_{\text{H}}$  0.44 (s, 9H), 7.09 (dd,  $J=8.0$  and 4.6 Hz, 1H), 7.73 (dd,  $J=8.2$  and 1.5 Hz, 1H), 8.67 (dd,  $J=4.6$  and 1.2 Hz, 1H).  $\delta_{\text{C}}$  -0.6, 124.3, 129.6, 138.7, 148.1, 167.6. HRMS (ESI),  $[\text{M}+\text{H}]$ , Calcd(found) : 229.9995 (230.0020).

**3-bromo-2-chloro-pyridine (2b).**<sup>1</sup> Obtained by the general procedure using  $\text{C}_2\text{Cl}_6$  as electrophile. Purification by column chromatography (hexane/AcOEt:8/2) gave **2b** (65%) as a yellow oil which solidified upon standing (mp°C, 53-56, lit.<sup>1</sup>, 54-56).  $\delta_{\text{H}}$  7.14 (dd,  $J=7.9$  and 4.7 Hz, 1H), 7.96 (dd,  $J=8.0$  and 1.8 Hz, 1H), 8.36 (dd,  $J=4.6$  and 1.6 Hz, 1H).  $\delta_{\text{C}}$  120.4, 123.5, 140.5, 142.3, 148.0

**3-bromo-2-iodo-pyridine (2c).**<sup>1</sup> Obtained by the general procedure using  $\text{I}_2$  as electrophile. Purification by column chromatography (hexane/AcOEt:8/2) gave **2c** (58%) as a yellow oil which solidified upon standing (mp°C, 50-53, lit.<sup>1</sup>, 50-52).  $\delta_{\text{H}}$  7.18 (dd,  $J=7.9$  and 4.6 Hz, 1H), 7.85 (dd,  $J=7.9$  and 1.6 Hz, 1H), 8.32 (dd,  $J=4.6$  and 1.9 Hz, 1H).  $\delta_{\text{C}}$  110.1, 124.0, 130.2, 140.0, 148.6.

**3-bromo-2-(tributylstannyl)pyridine (2d).** Obtained by the general procedure using  $\text{ClSnBu}_3$  as electrophile. Purification by column chromatography (hexane/AcOEt:7/3) gave **2d** (65%) as a colorless oil.  $\delta_{\text{H}}$  0.87 (m, 9H), 1.30 (m, 12H), 1.57 (m, 6H), 7.01 (dd,  $J=8.4$  and 4.9 Hz, 1H), 7.68 (dd,  $J=8.4$  and 1.6 Hz, 1H), 8.64 (dd,  $J=4.6$  and 1.2 Hz, 1H).  $\delta_{\text{C}}$  11.4, 14.3, 27.7, 29.4, 121.9, 123.5, 133.0, 136.9, 148.4. HRMS (ESI),  $[\text{M}+\text{H}]$ , Calcd(found): 448.0648 (448.0650).

**(3-bromopyridin-2-yl)(phenyl)methanone (2e).** Obtained by the general procedure using  $\text{PhCONMe}_2$  as electrophile. Purification by column chromatography (hexane/AcOEt:7/3) gave **2e** (60%) as a pale yellow solid (mp°C, 83).  $\delta_{\text{H}}$  7.33 (dd,  $J=8.4$  and 3.5 Hz, 1H), 7.40 (t,  $J=7.2$  Hz, 2H), 7.60 (m, 2H), 7.80 (d,  $J=6.8$  Hz, 1H), 8.06 (dd,  $J=8.3$  and 1.2 Hz, 1H), 8.65 (dd,  $J=4.6$  and 1.2 Hz, 1H).  $\delta_{\text{C}}$  117.8, 125.8, 128.8, 130.4, 134.2, 134.96, 141.1, 147.6, 156.1, 193.3. HRMS (ESI),  $[\text{M}+\text{Na}]$ , Calcd(found): 283.9681 (283.9690).

**1-(3-bromopyridin-2-yl)-2,2-dimethylpropan-1-one (2f).** Obtained by the general procedure using *t*-BuCN as electrophile. Purification by column chromatography (hexane/AcOEt:7/3) gave **2f** (73%) as a pale orange oil.  $\delta_{\text{H}}$  1.51 (s, 9H), 7.38 (dd,  $J=8.4$  and

4.6 Hz, 1H), 8.16 (dd,  $J=8.0$  and 1.2 Hz, 1H), 8.74 (dd,  $J=4.7$  and 1.2 Hz, 1H).  $\delta_C$  27.2, 28.7, 125.1, 126.9, 141.2, 147.2, 147.4, 219.7. HRMS (ESI), [M+Na], Calcd(found): 263.9994 (264.0020).

**(3-bromopyridin-2-yl)(phenyl)methanol (2g)**. Obtained by the general procedure using PhCHO as electrophile. Purification by column chromatography (hexane/AcOEt:7/3) gave **2g** (59 %) as a yellow solid (mp°C, 61).  $\delta_H$  5.32 (d,  $J=7.6$  Hz, 1H), 5.95 (d,  $J=7.5$  Hz, 1H), 7.07 (dd,  $J=8.0$  and 4.0 Hz, 1H), 7.27 (m, 5H), 7.81 (dd,  $J=8.0$  and 1.2 Hz, 1H), 8.54 (dd,  $J=4.7$  and 1.2 Hz, 1H).  $\delta_C$  73.7, 120.0, 124.3, 127.1, 127.9, 128.6, 141.3, 141.8, 146.9, 158.70. HRMS (ESI), [M+Na], Calcd(found): 285.9838 (285.9855)

**(3-bromopyridin-2-yl)(2-methoxyphenyl)methanol (2h)**. Obtained by the general procedure using *o*-AnisylCHO as electrophile. Purification by column chromatography (hexane/AcOEt:7/3) gave **2h** (79 %) as a yellow solid (mp°C, 98).  $\delta_H$  3.88 (s, 3H), 4.69 (brs, 1H), 5.14 (d,  $J=7.20$  Hz, 1H), 6.40 (d,  $J=7.20$  Hz, 1H), 6.81-6.94 (m, 3H), 7.20-7.26 (m, 2H), 7.86 (dd,  $J=8.0$  and 1.2 Hz, 1H), 8.61 (dd,  $J=4.7$  and 1.2 Hz, 1H).  $\delta_C$  55.9, 68.3, 111.2, 120.2, 120.6, 124.0, 128.3, 129.4, 130.1, 141.2, 146.5, 158.1, 159.0. HRMS (ESI), [M+Na], Calcd(found): 315.9944 (315.9960).
